# Supplementary material for: Identification of Prognostic Immune-Related Genes in Pancreatic Adenocarcinoma and Establishment of a Prognostic Nomogram: A Bioinformatic Study
Source: Biomed Res Int. 2020 Jun 9;2020:1346045. doi: 10.1155/2020/1346045 (PMC7301181; doi:10.1155/2020/1346045)
Supplement: Supplementary Materials — Table S1: the univariate survival analysis results of the TCGA and GEO cohort. [file 1346045.f1.xlsx]

## Sheet: TCGA cohort
The univariate survival analysis results of the TCGA cohort.
gene	HR	HR.95L	HR.95H	p value
TNFRSF4	0.830386	0.711962	0.968507	0.017905
FYN	0.885407	0.817929	0.958452	0.00261971
BCL2	0.815807	0.692302	0.961346	0.0150724
MAL	0.802627	0.645303	0.998307	0.0482475
IL31RA	6.10853	1.80112	20.7172	0.00368113
WAS	0.940275	0.894131	0.988801	0.0164564
ERAP2	1.53518	1.00218	2.46927	0.0364639
CD3E	0.961065	0.924508	0.999067	0.0447367
CD7	0.874118	0.774749	0.986232	0.0288798
CD28	0.727605	0.533014	0.993238	0.04521
IL1R2	1.0093	1.00024	1.01844	0.0442629
MLF1	1.08433	1.00951	1.16469	0.0264516
CCL2	0.985223	0.971937	0.99869	0.0316208
LY86	0.952606	0.914158	0.992671	0.0208929
KIRREL3	0.211567	0.0487631	0.917921	0.0380475
FOXP3	0.794005	0.653994	0.963991	0.0197805
EREG	1.70356	1.02933	2.76919	0.000944294
GPR65	0.749348	0.566573	0.991086	0.0431011
CD34	0.921815	0.864124	0.983358	0.0135523
DOCK2	0.878582	0.774775	0.996296	0.0436117
SYK	0.944034	0.897493	0.992988	0.0255659
CD83	0.948399	0.900557	0.998782	0.0448455
SEMA4D	0.792107	0.655867	0.956648	0.015512
SPI1	0.970898	0.944247	0.998302	0.0375595
CCR6	0.0282834	0.00155944	0.512973	0.0158899
PREX1	0.941391	0.89106	0.994564	0.03121
NCF4	0.947068	0.901171	0.995303	0.0318963
SLA2	0.735865	0.563892	0.960285	0.0239234
IL16	0.854849	0.742923	0.983637	0.028496
CKLF	2.04856	1.01618	4.18196	0.0030441
CST7	0.960059	0.922506	0.99914	0.0452619
ZAP70	0.82738	0.688584	0.994154	0.0431196
NOTCH4	0.816585	0.675741	0.986785	0.0359332
FCGRT	0.974004	0.954967	0.993421	0.00891299

## Sheet: GEO cohort
The univariate survival analysis results of the GEO cohort.
gene	HR	HR.95L	HR.95H	p value
ACKR2	0.263416	0.0818143	0.848116	0.0253452
ACVR2A	0.467346	0.261937	0.833835	0.01002
CD276	3.05155	1.22156	7.623	0.016922
CDK6	2.1827	1.04969	4.53864	0.0366362
CKLF	2.84092	1.1748	6.86994	0.0204746
CNIH1	5.05291	1.56273	16.3379	0.00681852
CTSS	0.463634	0.260925	0.823826	0.00877492
ERAP2	1.33065	1.00875	1.75527	0.0432175
EREG	1.42541	1.05194	1.93148	0.0222173
GPI	1.88404	1.10552	3.2108	0.0198709
HELLS	1.77037	1.11754	2.80458	0.0149585
IFNK	0.120393	0.0170819	0.848533	0.0336019
IGSF6	0.42481	0.185346	0.97366	0.0430689
IL18BP	5.04393	1.28564	19.7888	0.0203287
IL4R	2.25098	1.08267	4.67999	0.0298056
LIG3	4.21392	1.00015	17.7545	0.0499763
PRELID1	3.53993	1.11572	11.2314	0.0318861
PRG3	0.276296	0.0776605	0.982992	0.0469827
PTGDR2	0.267131	0.0853525	0.83605	0.0233554
RUNX1	2.08864	1.04582	4.17129	0.0368961
S1PR4	0.317038	0.110829	0.906918	0.0321806
SEMA7A	1.91628	1.24769	2.94315	0.00297068
TAPBP	3.08904	1.31682	7.24637	0.00952475
TGFB1	2.82071	1.3906	5.72158	0.00405661
